# Supplementary material
Source: MDPI journal article supplement (https://www.mdpi.com/2313-5778/6/4/93)
Supplement: s1 [file s1]

**SM-1. Árpád Béla III., 7-generation chart with indication of the nationality of the corresponding family**

**Note:** The classification follows nationality, but not strictly considered ethnic origin, e. g. Byzantine families can be of various ethnic descendance. Moreover, reliable ethnic classification could be defined presently only on DNA basis, which is not available in the majority of the cases.

**1 Árpád Béla III**, King of Hungary and Croatia, \* (1148/50.), +1196.04.23., 1163-69: Heir to the Emperor of Byzantium, 1172: King. **ES.II.T.154.**

---

**2 Árpád Géza II**, King of Hungary and Croatia, \* (1130.), +1182.05.03. **Magyar/Hungarian**

**3 Rurik-Kiev** Euphrosina Mstislava, +1186. **ES.II.T.135. Varangian-Rus**

---

**4 Árpád Béla II**, „the Blind”, King of Hungary and Croatia, \* (1109.), +1141.02.13. **Magyar/Hungarian**

**5** 1127.04.29. (**Nemanjić**) Jelena/Ilona, +after 1146. **ES.III/1.T.181. Serbian**

**6 Rurik-Kiev** Mstislav II Vladimirovich, Grand Prince of Kiev, \* 1076., +1132.04.15. **Varangian-Rus**

**7 Saviditsova / Zavidich** N. (Lyubava?) Dmitrieva, + after 1168., **ES.II.T.135. Russian**

---

**8 Árpád Álmos**, Hungarian Prince, King of Croatia, \* (1068.), +1129. **Magyar/Hungarian**

**9 Rurik-Kiev** Predeslava Svyatopolkovna, **ES.II.T.130. Varangian-Rus**

**10 (Nemanjić)** Uros I., Duke of Serbia (Hung., later Byzantine vasall), \* (1080.), +after 1130. **Serbian**

**11 Diogenissa Anna** **Byzantine**

**12 Rurik-Kiev** (Saint) Vladimir Vsevolodovich Monomaches, Grand Prince of Kiev, \* 1053., +1125.05.19. **Varangian-Rus**

**13 (1) Wessex-England** Gythe **ES.II.T.78. Anglo-Saxon**

**14 Savidich / Zavidich** Dimitrij, nobelman of Novgorod, +1167. **Russian**

**15** N. N.

---

**16 Árpád Géza I /Magnus**, \* King of Hungary, 1044/45., +1077.04.25. **Magyar**

**17** 1065/73 (2) **Synadena** N. 1074: Queen, 1080: goes back to Byzantium (according to ES.II.T.154.), \* 1058.05.12., +1082.12.20. **Byzantine**

**18 Rurik-Kiev** Svyatopolk II Michail Iziaslavich, Grand Prince of Kiev, \* 1050.11.08., +1113.04.16. **Varangian-Rus**

**19 (1)** N. N. (concubine)

**20 (Nemanjić)** N. (Marko?) **Serbian**

**21** N. N.

**22 Diogenes** Konstantinos, + (battle) 1074. **Byzantine**

**23 Komnene** Theodora (sister of Emperor **Kommenos** Alexios I.), **ES.II.T.174. Byzantine**

**24 Rurik-Kiev** Vsevolod Yaroslavich, Grand Prince of Kiev, +1093.04.13. **Varangian-Rus**

**25 Monomaches** Maria, +1067. **Byzantine**

**26 Wessex-England** Harold, King of England, \* (1020.), +(battle) 1066.10.14. **Anglo-Saxon**

**27 Mercia** Ealgydth/Edith, +1066.10.14., **ES.II.T.78. Anglo-Saxon**

**28 ..... 31** N. N.

---

**32 Árpád Béla I**, King of Hungary, +1063.12.... **Magyar/Hungarian**

**33 Piast** Ryksa/Richeisa, \* (1018.), +after 1059. **ES.II.T.120. Polish**

**34 Synadenos** Theodoulos, Byzantine military officer, \* ca. 1020., +1050. **Byzantine**

**35 (2) Botaneiataina/Botaneiatissa** N. (Sister of Emperor **Botaneiates** Nikephoros III, 1002-1081, Emp.: 1078.01.07-1081.04.01.) **Byzantine**

- 36 **Rurik-Kiev** Izaislav I Yaroslavich, Grand Prince of Kiev, +(battle) 1078.10.03. **Varangian-Rus**
- 37 **Piast** Gertruda, +1108.01.04., **ES.II.T.120. Polish**
- 38 N. N.
- 39 N. N.
- 40 (**Nemanjić**) N. (Petrislav?, assumed: son of Liubomir, Grand Župan and Bosnia N.) **Serbian**
- 41 ..... 43 N. N.
- 44 **Diogenes** Romanos IV, Byzantine Emperor, \*c. 1030., +(blinded) 1072.08.04., Emp.: 1068-1071. **Byzantine**
- 45 (1) **Cometopuli** N (Anna?). (daughter of C. Alusian from Bulgaria) **Bulgarian**
- 46 **Komnenos** Ioannes, patrikios, kuroplates, +1067.07.12. **Byzantine**
- 47 1042 **Charon-Dalassene** Anna, Regent of the Byzantine Empire, \*c.1025.,+(nun) 1100/1101. **Byzantine**
- 48 **Rurik-Kiev** Yaroslav I Vladimirovich „the Wise”, Grand Prince of Kiev, \*(978)/980., +1054.02.20. **Varangian-Rus**
- 49 **Sweden** Ingegerd/Anna, +1050.02.10. **ES.II.T.114. Swedish**
- 50 **Monomachos** Konstantinos IX, Byzantine Emperor, \* 1000., +1055.01.11., Emp.: 1042.06.11.-1055.01.11. **Byzantine**
- 51 ante 1025. (1) **Skeraína** N. (Maria/Elena?), \*1001., +1033/45. **Byzantine**
- 52 **Wessex** Godwin, Earl of Wessex, +1053.04.15. **Anglo-Saxon**
- 53 **Sparkalegg** Gytha Torkelsdottir, **ES.II.T.78. Anglo-Saxon**
- 54 **Mercia** Alfgar, Earl of Mercia and of East Anglia, + c. 1060. **Anglo-Saxon**
- 55 **Malet** Aelfifu (Sister of M. William, Lord of Eye) **Anglo-Saxon**
- 56 ..... 63 N. N.
- 
- 64 **Árpád** Vazul/Vászoly, Hungarian Prince, +(blinded) 1037. Spring, **ES.II.T.153. Magyar**
- 65 **Cometopuli** N. katun, **ES.II.T.168. Bulgarian**
- 66 **Piast** Mieszko I (II?) Lambert, King of Poland, \*990., +1034.05.10. **Polish**
- 67 **Ezzonen-Lothringen** Richeza, +1063.03.22., **ES.I/2.T.201. German-Frank**
- 68 (assumed) **Synadenos** N. **Byzantine**
- 69 N. N.
- 70 **Botaneiates** Nikephoros **Byzantine**
- 71 **Dukaina** N. (Sister of Emperor **Dukas** Michael VII, +1090., daughter of Emperor D. Konstantinos X, +1067.05.22. and **Makrembolitissa** Eudokia) **ES.II.T.178. Byzantine**
- 72 **Rurik-Kiev** Yaroslav I Vladimirovich „the Wise”, Grand Prince of Kiev, \*(978)/980., +1054.02.20. **Varangian-Rus**
- 73 **Sweden** Ingegerd (Anna), +1050.02.10., **ES.II.T.114. Swedish**
- 74 **Piast** Mieszko I (II?) Lambert, King of Poland, \*990., +1034.05.10. **Polish**
- 75 **Ezzonen-Lothringen** Richeza, +1063.03.22., **ES.I/2.T.201. German-Frank**
- 76 ..... 79 N. N.
- 80 (assumed:) (**Nemanjić**) Liubomir, Grand Župan (of Serbia?) **Serbian**
- 81 (assumed:) **Bosnia** N. **Bosnian**
- 82 ..... 87 N. N.
- 88 **Diogenes** Konstantinos, general, +(suicide) 1032. **Byzantine**
- 89 **Argyra** N. (Daughter of A. Basileos, who was brother of Emperor A. Romanos III, +1034.04.11.) **Byzantine**
- 90 **Cometopuli** Alusian, patrikios, for a short time tsar of Bulgaria in 1041. **Bulgarian**
- 91 N. N. (Armenian nobelwoman from Kharsianon) **Armenian**

- 92 Komnenos** Manuel Erotikos, 950/1020. **Byzantine**
- 93 N.** (Maria?), +ca. 1015.
- 94 Charon** Alexios, prefect of Italy **Byzantine**
- 95 Dalassena** N. (Daughter of **Dalassenos** Adrianos, uncle of **D.** Theophylaktos, general, military governor of Antiochia) **Byzantine**
- 96 Rurik-Kiev** (Saint) Vladimir Svyatoslavich, Prince of Novgorod, Grand Prince of Kiev, +1015.07.15. **Varangian-Rus**
- 97 Polotsk** Rongned, + (nun) 1002., **ES.II.T.127. Varangian**
- 98 Sweden** Olaf III, „Olaf Skotkonug“, King of Sweden, +1022. **Swedish**
- 99 N.** Estrid, Princess of the Obotrites, **ES.II.T.114. Swedish**
- 100 Monomachos** Theodosios, Byzantine state official **Byzantine**
- 101 N. N.** (Perhaps of armenian origin) **Armenian**
- 102 Skleros** Basileos, governor **Byzantine**
- 103 Argyra** Pulcherina (Sister of Emperor **Argyros** Romanos III) **Byzantine**
- 104** (Uncertain) (**Wessex**) Wulfnot Cild, Thegan of Sussex, +ca. 1014. **Anglo-Saxon**
- 105 N. N.**
- 106 Sparklegg (Sparkling?)** Thorgil **Anglo-Saxon**
- 107** (partner?) **Halland** Sigrid (assumed:) **Anglo-Saxon**
- 108 Mercia** Leofric, Earl of Mercia, +1057.08.31./09.30. **Anglo-Saxon**
- 109 N.** Godiva/Godgyfu, Lady, +1066/86. **Anglo-Saxon**
- 110 ..... 127 N. N.**
